## PUBLISHER'S NOTE

# Expression of Concern: N-terminal palmitoylation within the appropriate amino acid environment conveys on NOS2 the ability to progress along the intracellular sorting pathways. *J. Cell Sci.* doi: 10.1242/jcs.02878

**Inmaculada Navarro-Lérida, Alberto Álvarez-Barrientos and Ignacio Rodríguez-Crespo**

This Expression of Concern relates to the article 'N-terminal palmitoylation within the appropriate amino acid environment conveys on NOS2 the ability to progress along the intracellular sorting pathways' by Inmaculada Navarro-Lérida, Alberto Álvarez-Barrientos and Ignacio Rodríguez-Crespo (2006). *J. Cell Sci.* **119**, 1558-1569 (doi: 10.1242/jcs.02878).

We have recently been made aware of concerns regarding some of the data in Fig. 1C and Fig. 3A. After discussion with the corresponding author, Ignacio Rodríguez-Crespo, we have referred this matter to Dr Rodríguez-Crespo's institute. Journal of Cell Science is publishing this note to make readers aware of the issue, and we will provide further information once it has been resolved.

This course of action follows the advice set out by COPE (Committee on Publication Ethics), of which Journal of Cell Science is a member.

See also:

doi: 10.1242/jcs.209973

doi: 10.1242/jcs.209981

doi: 10.1242/jcs.210005
